# Supplementary material for: Associations between High Protein Intake, Linear Growth, and Stunting in Children and Adolescents: A Cross-Sectional Study
Source: MDPI journal article supplement (doi:10.3390/nu15224821), 2023-11-17
Supplement: s1 [file s1]

# **Associations between High Protein Intake, Linear Growth, and Stunting in Children and Adolescents: A Cross-Sectional Study**

## **Supplementary online content**

**Supplemental Figure S1.** Flow of participants in current study.

**Supplemental Figure S2.** The association of different sources of protein intake with body height and HAZ.

**Supplemental Figure S3.** The gender-specific association between dietary protein intake and linear growth.

**Supplemental Figure S4.** The puberty stage-specific association between dietary protein intake and linear growth.

**Supplemental Table S1.** Association of protein intake from different sources with body height and HAZ.

**Supplemental Table S2.** Stratified analyses of potential modification effect for the association of dietary protein intake with linear growth.

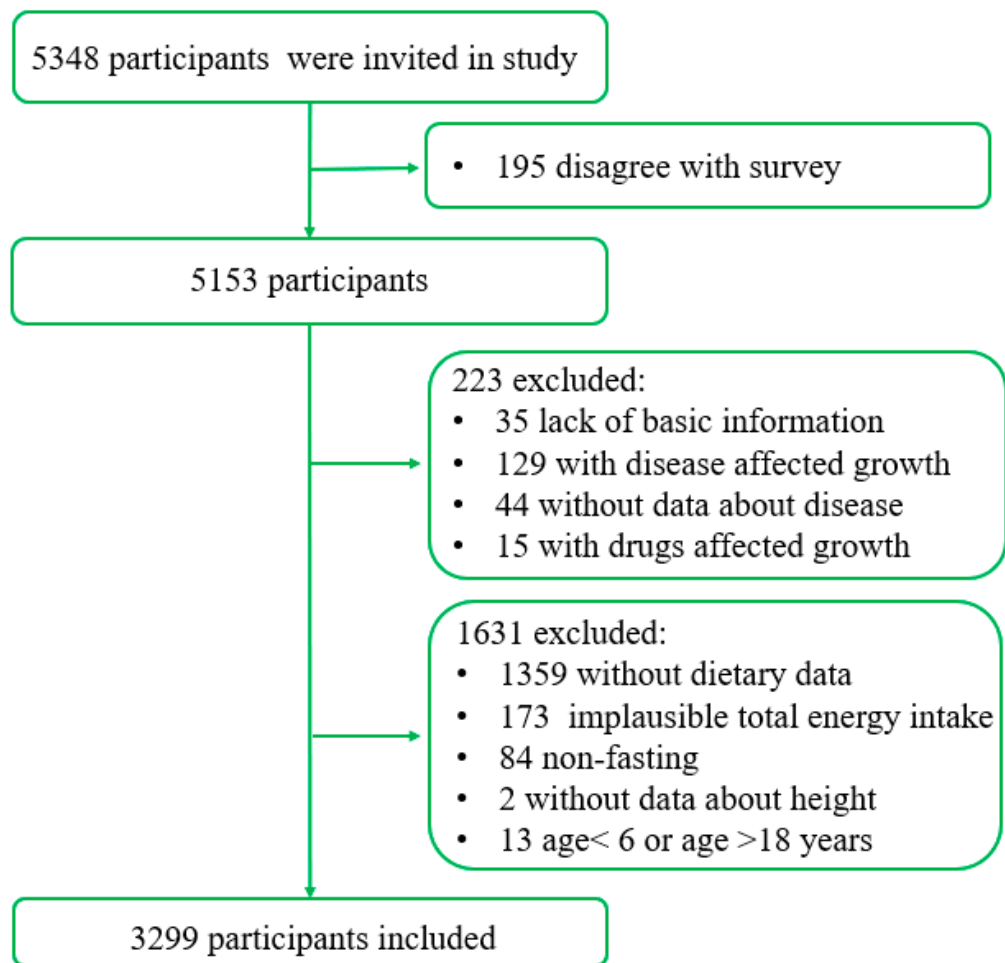

**Supplemental Figure S1. Flow of participants in current study**

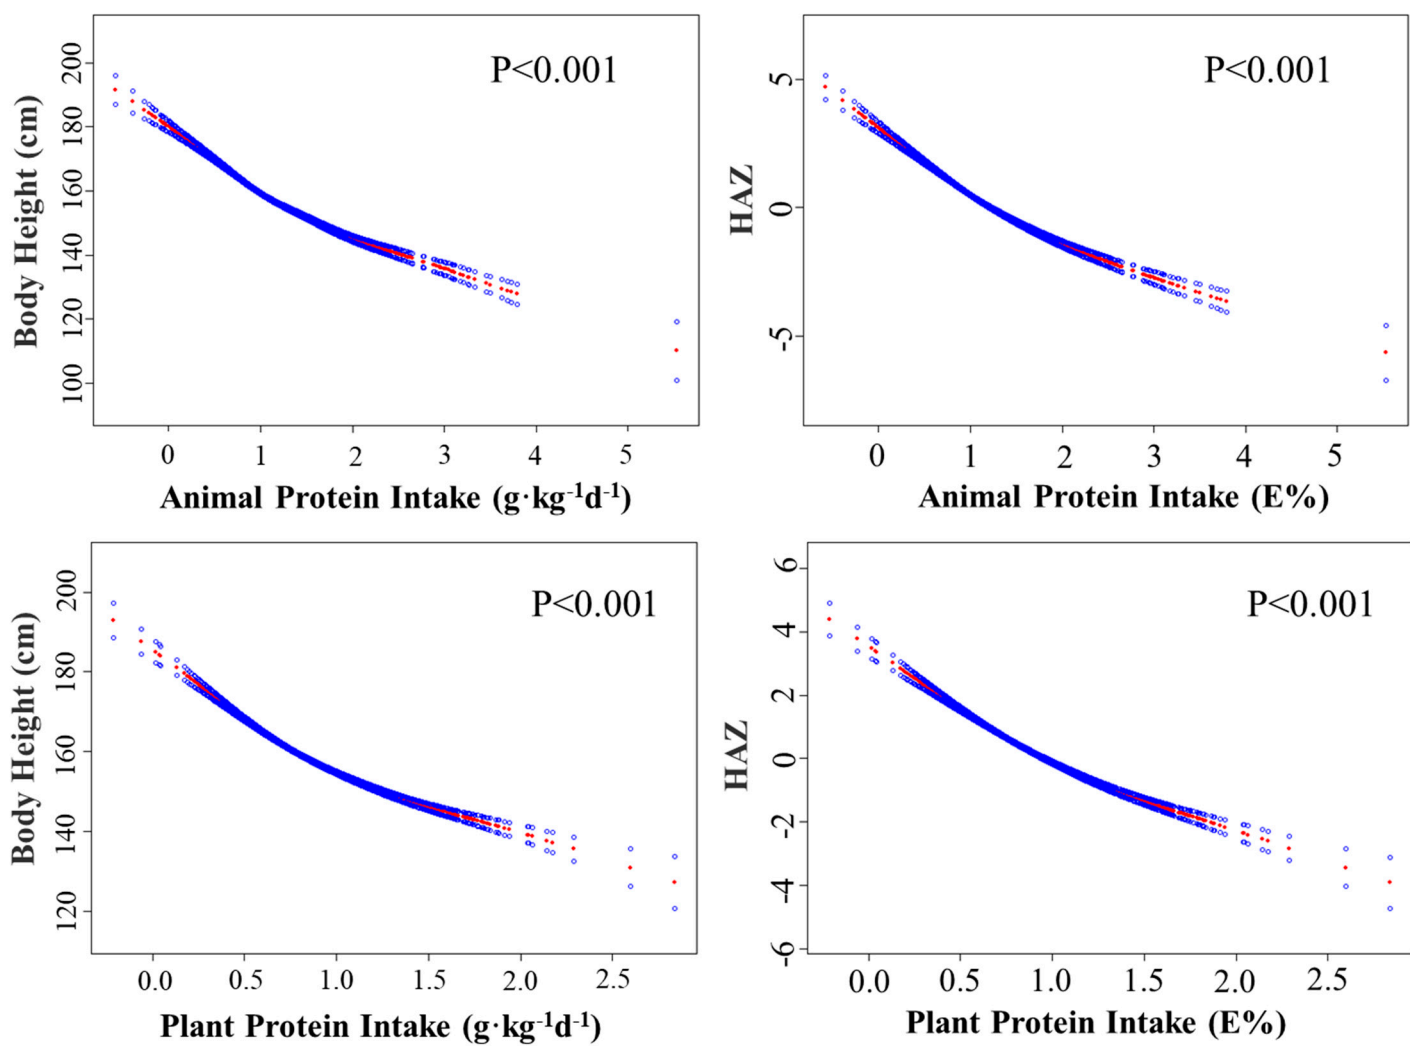

**Supplemental Figure S2. The association of different sources of protein intake with body height and HAZ.**

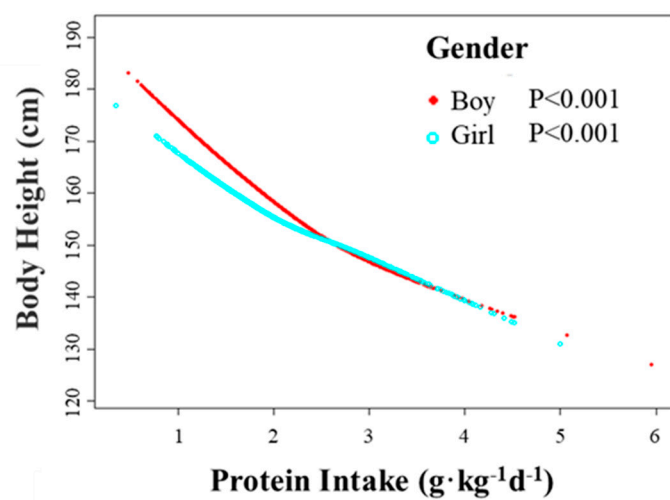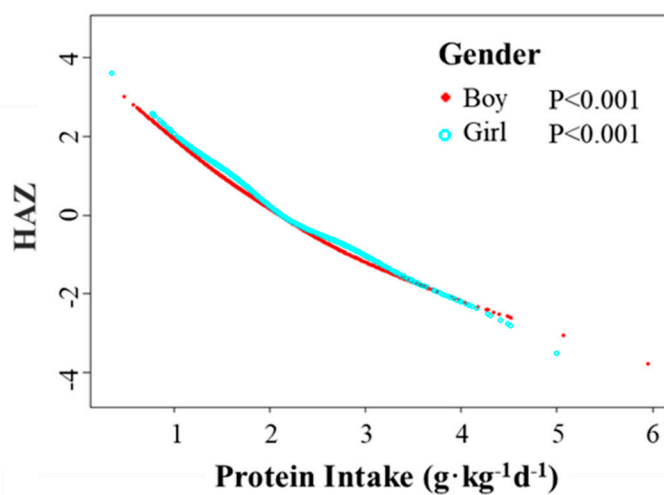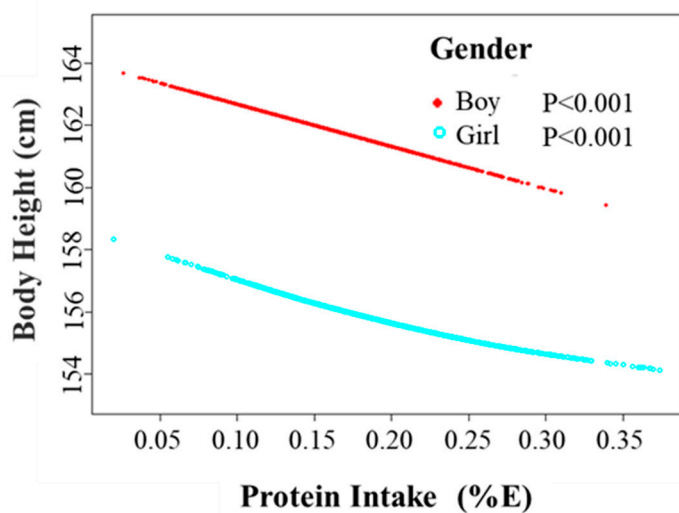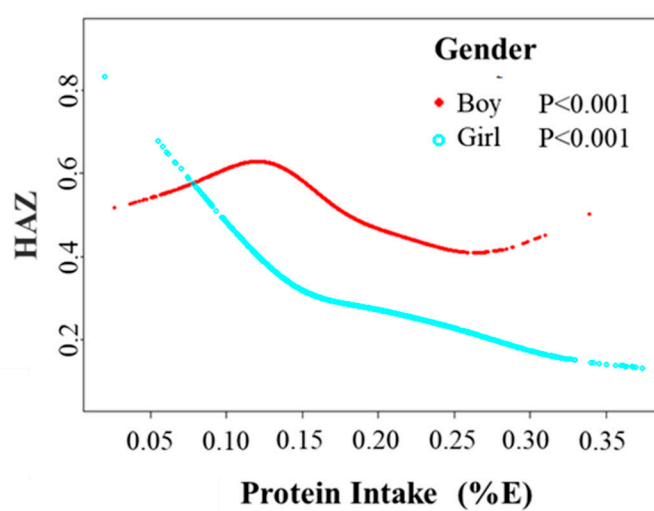

**Supplemental Figure S3. The gender-specific association between dietary protein intake and linear growth.**

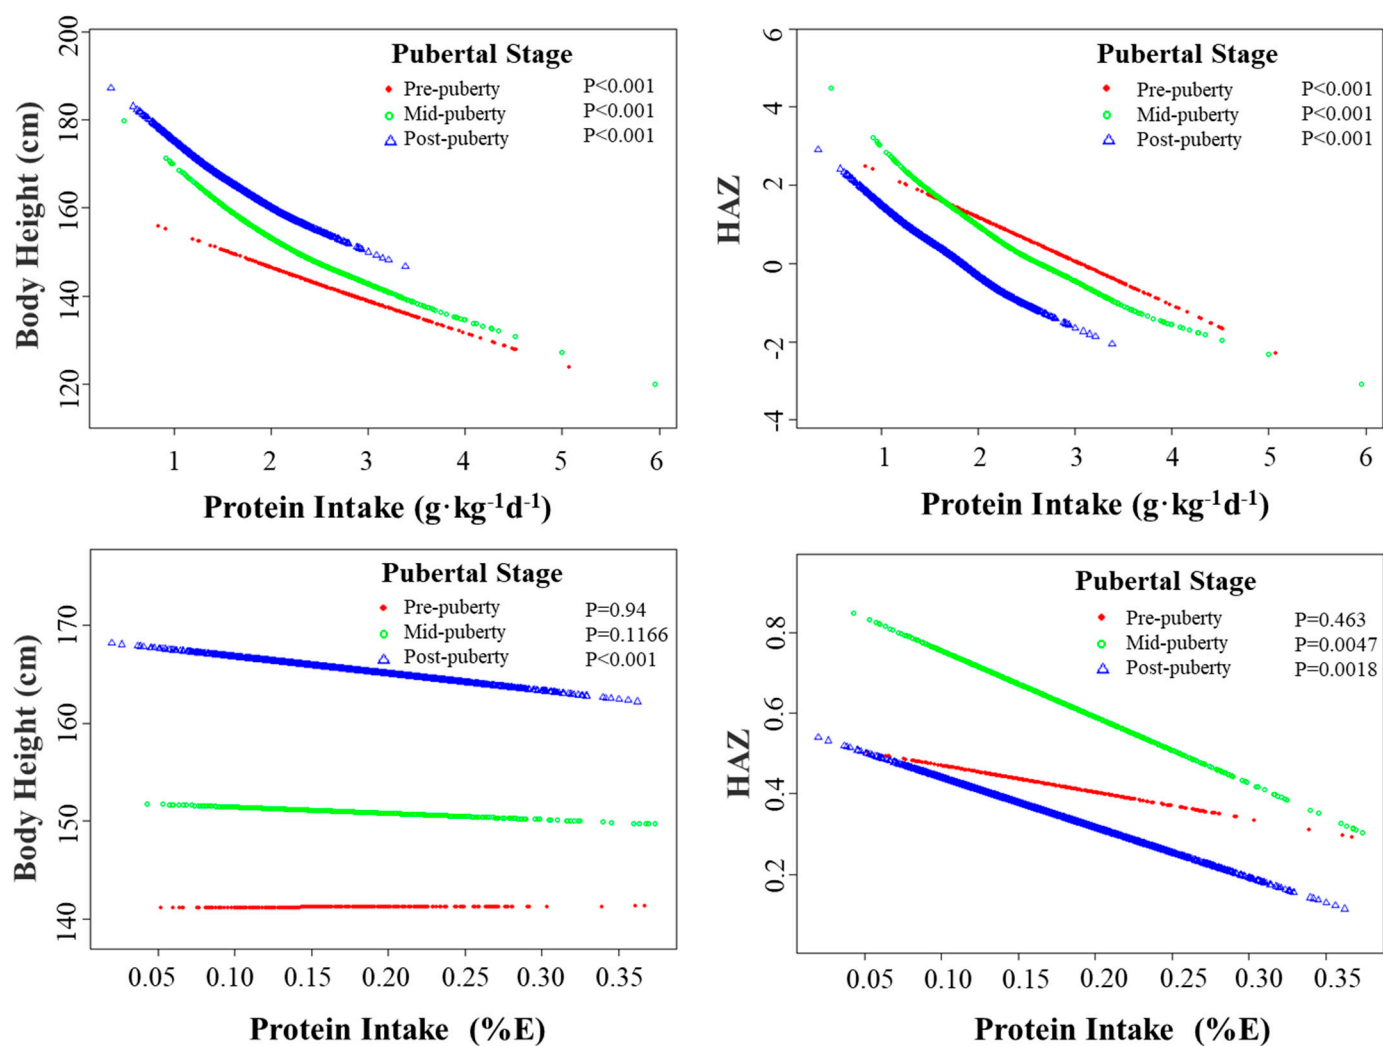

**Supplemental Figure S4.** The pubertal stage-specific association between dietary protein intake and linear growth.

**Supplemental Table S1. Association of protein intake from different sources with body height and HAZ.**

| Protein Source        | Protein intake, g·kg <sup>-1</sup> ·d <sup>-1</sup> |        |                      |        | Protein intake, %E   |        |                      |        |
|-----------------------|-----------------------------------------------------|--------|----------------------|--------|----------------------|--------|----------------------|--------|
|                       | Body height                                         |        | HAZ                  |        | Body height          |        | HAZ                  |        |
|                       | β(95%CI)                                            | P      | β(95%CI)             | P      | β(95%CI)             | P      | β(95%CI)             | P      |
| <b>Animal protein</b> |                                                     |        |                      |        |                      |        |                      |        |
| Crude model           | -6.74 (-7.09, -6.38)                                | <0.001 | -0.14 (-0.18, -0.11) | <0.001 | -1.80 (-2.22, -1.39) | <0.001 | -0.06 (-0.09, -0.02) | 0.001  |
| Model I <sup>a</sup>  | -6.48 (-6.88, -6.08)                                | <0.001 | -0.92 (-0.98, -0.87) | <0.001 | -0.81 (-1.13, -0.50) | <0.001 | -0.08 (-0.12, -0.03) | 0.001  |
| Model II <sup>a</sup> | -6.49 (-6.90, -6.08)                                | <0.001 | -0.93 (-0.99, -0.87) | <0.001 | -0.81 (-1.12, -0.49) | <0.001 | -0.08 (-0.13, -0.03) | <0.001 |
| <b>Plant protein</b>  |                                                     |        |                      |        |                      |        |                      |        |
| Crude model           | -8.31 (-8.62, -8.00)                                | <0.001 | -0.20 (-0.24, -0.17) | <0.001 | -1.83 (-2.25, -1.41) | <0.001 | -0.10 (-0.13, -0.06) | <0.001 |
| Model I <sup>b</sup>  | -5.72 (-6.05, -5.39)                                | <0.001 | -0.81 (-0.85, -0.76) | <0.001 | -0.77 (-1.04, -0.50) | <0.001 | -0.08 (-0.12, -0.04) | <0.001 |
| Model II <sup>b</sup> | -5.72 (-6.06, -5.39)                                | <0.001 | -0.82 (-0.87, -0.77) | <0.001 | -0.77 (-1.04, -0.50) | <0.001 | -0.08 (-0.12, -0.04) | <0.001 |

Abbreviations: HAZ, height-for-age z score.

A generalized linear model was used. Protein intake was set to 1 SD increase of grams per kilogram weight per day (g·kg<sup>-1</sup>·d<sup>-1</sup>) or percentage of total energy intake (%E). Crude model, not adjusted for any variables; Model I, adjusted for gender, ethnicity, age (as a continuous variable), pubertal stages, premature, birth length, maternal age (as a continuous variable), parental education levels (as a continuous variable), parental height (as a continuous variable), household income levels, smoking status, drinking status, moderate to vigorous physical activity (MVPA), central obesity, nighttime sleep duration (as a continuous variable), dietary fat intake (as a continuous variable), and dietary carbohydrate intake (as a continuous variable); Model II, additional adjustment for serum calcium, zinc, vitamin D<sub>3</sub>, and vitamin A levels as continuous variables.

<sup>a</sup> The models were additionally adjusted for plant protein intake.

<sup>b</sup> The models were additionally adjusted for animal protein intake.

**Supplemental Table S2. Stratified analyses of potential modification effect for the association of dietary protein intake with linear growth.**

| Stratification factors | N    | Body height             |         |                   | HAZ                  |         |                   |
|------------------------|------|-------------------------|---------|-------------------|----------------------|---------|-------------------|
|                        |      | $\beta$ (95%CI)         | P value | P for interaction | $\beta$ (95%CI)      | P value | P for interaction |
| <b>Gender</b>          |      |                         |         | <0.001            |                      |         | 0.7741            |
| Boy                    | 1837 | -10.77 (-11.35, -10.19) | <0.001  |                   | -1.23 (-1.31, -1.14) | <0.001  |                   |
| Girl                   | 1462 | -6.92 (-7.52, -6.33)    | <0.001  |                   | -1.21 (-1.30, -1.12) | <0.001  |                   |
| <b>Pubertal stage</b>  |      |                         |         | <0.001            |                      |         | <0.001            |
| Pre-puberty            | 343  | -6.38 (-7.17, -5.59)    | <0.001  |                   | -0.98 (-1.09, -0.86) | <0.001  |                   |
| Mid-puberty            | 887  | -9.73 (-10.35, -9.10)   | <0.001  |                   | -1.30 (-1.40, -1.21) | <0.001  |                   |
| Post-puberty           | 2069 | -11.31 (-12.12, -10.50) | <0.001  |                   | -1.41 (-1.53, -1.29) | <0.001  |                   |

Abbreviations: HAZ, height-for-age z score.

A generalized linear model was used. Protein intake was set to 1 SD increase of grams per kilogram weight per day ( $\text{g}\cdot\text{kg}^{-1}\cdot\text{d}^{-1}$ ). Adjusted for gender, ethnicity, age (as a continuous variable), pubertal stages, premature, birth length, maternal age (as a continuous variable), parental education levels (as a continuous variable), parental height (as a continuous variable), household income levels, smoking status, drinking status, moderate to vigorous physical activity (MVPA), central obesity, length of nighttime sleep (as a continuous variable), dietary fat intake (as a continuous variable), and dietary carbohydrate intake (as a continuous variable), and serum calcium, zinc, vitamin D<sub>3</sub>, and vitamin A levels as continuous variables. Analyses that were stratified by gender (boy or girl), pubertal stage (pre-puberty, mid-puberty, or post-puberty), and each of the other groups were adjusted for all covariates except itself.
